# Supplementary material
Source: publisher site journal article supplement (https://www.spandidos-publications.com/2746/downloadSupplementary)
Supplement: Supplementary file 1 [file downloadSupplementary]

## Sheet: Sheet1
Table SIV. IPA analysis of DEPs. IPA, Ingenuity pathway analysis; DEPs, differentially expressed proteins.
© 2000-2019 QIAGEN. All rights reserved.
Categories	Diseases or Functions Annotation	p-value	Predicted Activation State	Activation z-score	Molecules	# Molecules
Neurological Disease	Tremor	0.0141	Decreased	-2	ASPA,KCNJ10,PTPN9,QKI	4
Neurological Disease	Movement Disorders	0.0296	Decreased	-2.19	A2M,ASPA,CRYAB,DNAJB2,EIF3K,KCNJ10,LAMA1,MSRA,MYO1B,PFDN1,PTPN9,QKI,SCN3A,SQSTM1,TOMM20	15
Organismal Survival	Organismal death	0.049	Decreased	-4.22	ABR,ACTL6A,APOH,ASPA,BMPR2,CRLF1,CRYAB,DVL1,DYRK1A,GSTZ1,KCNJ10,KIDINS220,KPNA1,LAMA1,MAN2A2,MSRA,NELFB,PCLO,PIKFYVE,PNN,POMC,PTPN9,QKI,RAB10,SNX1,SQSTM1,USP4	27
Cellular Assembly and Organization,Cellular Function and Maintenance	Organization of cytoplasm	0.00292	Increased	2.453	A2M,ABR,CRYAB,DGKG,DVL1,DYRK1A,HOOK3,KIDINS220,KPNA1,LAMA1,MAPRE1,MYO1B,PCLO,PFDN1,POMC,RAB10,RAB23,RAB33A,RANBP10,RFX2,SEC61A1,SNX1,SQSTM1	23
Cellular Assembly and Organization,Cellular Function and Maintenance	Organization of cytoskeleton	0.00407	Increased	2.453	A2M,ABR,CRYAB,DGKG,DVL1,DYRK1A,HOOK3,KIDINS220,KPNA1,LAMA1,MAPRE1,MYO1B,PCLO,PFDN1,POMC,RAB10,RAB23,RAB33A,RANBP10,RFX2,SNX1	21
Cellular Assembly and Organization,Cellular Function and Maintenance	Microtubule dynamics	0.0161	Increased	2.453	A2M,CRYAB,DGKG,DVL1,DYRK1A,HOOK3,KIDINS220,KPNA1,LAMA1,MAPRE1,POMC,RAB10,RAB23,RAB33A,RANBP10,RFX2,SNX1	17
Cellular Development,Cellular Growth and Proliferation,Nervous System Development and Function,Tissue Development	Development of neurons	0.0257	Increased	2.433	A2M,ASPA,DVL1,DYRK1A,FNTA,KCNJ10,KIDINS220,LAMA1,POMC,RAB10,RAB33A,SNX1	12
Cell Morphology,Cellular Assembly and Organization,Cellular Development,Cellular Function and Maintenance,Cellular Growth and Proliferation,Nervous System Development and Function,Organismal Development,Tissue Development	Neuritogenesis	0.0488	Increased	2.219	A2M,DVL1,DYRK1A,KIDINS220,LAMA1,POMC,RAB10,RAB33A,SNX1	9
Carbohydrate Metabolism,Small Molecule Biochemistry	Metabolism of N-acetylmannosamine	2.84e-05			NAGK,RENBP	2
Connective Tissue Development and Function,Tissue Development	Accumulation of visceral fat	8.5e-05			POMC,SQSTM1	2
Cell Cycle	Replication of Salmonella enterica subsp. enterica serovar Typhimurium	8.5e-05			PIKFYVE,SQSTM1	2
Developmental Disorder,Embryonic Development,Organismal Development,Tissue Morphology	Abnormal morphology of embryoblast	0.000515			BMPR2,LAMA1,NELFB,PIKFYVE	4
Cellular Assembly and Organization	Distribution of endosomes	0.000586			MYO1B,RAB22A	2
Molecular Transport	Quantity of citric acid	0.000586			ISCU,SLC13A5	2
Carbohydrate Metabolism,Nucleic Acid Metabolism,Small Molecule Biochemistry	Synthesis of UDP-N-acetylglucosamine	0.000779			NAGK,RENBP	2
Cellular Assembly and Organization	Transport of endosomes	0.0009			HOOK3,RAB10,SQSTM1,TOM1	4
Cellular Assembly and Organization	Distribution of lysosome	0.000998			HOOK3,MYO1B	2
Amino Acid Metabolism,Small Molecule Biochemistry	Metabolism of L-amino acid	0.0014			ASPA,GSTZ1,MSRA,PSPH	4
Cellular Assembly and Organization	Translocation of vesicles	0.00151			PCLO,RAB10	2
Carbohydrate Metabolism,Small Molecule Biochemistry	Metabolism of N-acetylglucosamine	0.00213			NAGK,RENBP	2
Organ Morphology,Tissue Development	Regeneration of anterior tibial muscle	0.00248			CRYAB,USP19	2
Cellular Assembly and Organization	Quantity of vesicles	0.00281			PCLO,PIKFYVE,RAB33A,SNX1	4
Developmental Disorder,Embryonic Development,Organismal Development,Tissue Morphology	Lack of blastocele	0.00285			LAMA1,PIKFYVE	2
Neurological Disease,Organismal Injury and Abnormalities	Abnormal brain myelination	0.00285			ASPA,QKI	2
Cellular Assembly and Organization	Formation of endosomes	0.00367			PIKFYVE,RAB22A	2
Embryonic Development,Organismal Development,Tissue Morphology	Morphology of germ layer	0.00374			BMPR2,LAMA1,PIKFYVE,RAB10	4
Cell Morphology,Cellular Assembly and Organization	Morphology of vesicles	0.0041			GABARAPL1,PIKFYVE,PTPN9	3
Cell Signaling,Nucleic Acid Metabolism,Small Molecule Biochemistry	Stimulation of cyclic AMP	0.00411			POMC,RLN3	2
Carbohydrate Metabolism,Lipid Metabolism,Small Molecule Biochemistry	Synthesis of phosphatidylinositol 4,5-diphosphate	0.00458			PIKFYVE,POMC	2
Nervous System Development and Function,Tissue Morphology	Quantity of neurons	0.00469		1.254	A2M,ASPA,CRLF1,DVL1,DYRK1A,KIDINS220,PCLO,POMC,SQSTM1	9
Cellular Assembly and Organization,Cellular Function and Maintenance	Organization of microtubules	0.00491			DVL1,HOOK3,MAPRE1	3
Cellular Assembly and Organization,Cellular Function and Maintenance	Focusing of microtubules	0.00536			MAPRE1	1
Developmental Disorder,Hereditary Disorder,Metabolic Disease,Organismal Injury and Abnormalities	Congenital disorder of glycosylation type 1e	0.00536			DPM1	1
Developmental Disorder,Hereditary Disorder,Ophthalmic Disease,Organismal Injury and Abnormalities	Posterior polar cataract type 2	0.00536			CRYAB	1
Carbohydrate Metabolism,Energy Production	Oxidation of ascorbic acid	0.00536			CRYAB	1
Endocrine System Development and Function,Lipid Metabolism,Small Molecule Biochemistry,Vitamin and Mineral Metabolism	Steroidogenesis of endocrine cell lines	0.00536			POMC	1
Cell Death and Survival,Cell Morphology,Cellular Compromise,Nervous System Development and Function	Vacuolation of spinal neuron	0.00536			KCNJ10	1
Endocrine System Development and Function,Organ Development	Activation of adrenal gland	0.00536			POMC	1
Cell Morphology,Cellular Function and Maintenance	Transmembrane potential of kidney cell lines	0.00536			KCNJ10	1
Cardiovascular Disease,Cardiovascular System Development and Function,Hereditary Disorder,Organ Morphology,Organismal Development,Organismal Injury and Abnormalities,Skeletal and Muscular Disorders	Dilated cardiomyopathy type 1II	0.00536			CRYAB	1
Developmental Disorder,Hereditary Disorder,Metabolic Disease,Organismal Injury and Abnormalities,Renal and Urological Disease	Classic maple syrup urine disease	0.00536			BCKDHB	1
Nucleic Acid Metabolism,Small Molecule Biochemistry	Activation of cyclic GMP	0.00536			POMC	1
Cell Morphology,Cellular Assembly and Organization,Organismal Injury and Abnormalities	Swelling of endosomes	0.00536			PIKFYVE	1
Lipid Metabolism,Molecular Transport,Small Molecule Biochemistry	Release of 14,15-epoxyeicosatrienoic acid	0.00536			POMC	1
Connective Tissue Disorders,Developmental Disorder,Neurological Disease,Organismal Injury and Abnormalities,Skeletal and Muscular Disorders	Pontocerebellar hypoplasia, type 3	0.00536			PCLO	1
Developmental Disorder,Hereditary Disorder,Metabolic Disease,Organismal Injury and Abnormalities	Deficiency of proopiomelanocortin	0.00536			POMC	1
Gastrointestinal Disease,Hematological Disease,Hepatic System Disease,Metabolic Disease,Organismal Injury and Abnormalities	Mild hypersuccinylacetonemia	0.00536			GSTZ1	1
Cellular Assembly and Organization	Binding of lipid bilayer	0.00536			APOH	1
Cell Morphology,Cell-To-Cell Signaling and Interaction,Cellular Assembly and Organization,Nervous System Development and Function,Visual System Development and Function	Electrical resistance of Muller glia	0.00536			KCNJ10	1
Developmental Disorder,Hereditary Disorder,Organismal Injury and Abnormalities,Skeletal and Muscular Disorders	Alpha-B crystallin-related fatal infantile hypertonic myofibrillar myopathy	0.00536			CRYAB	1
Connective Tissue Disorders,Developmental Disorder,Hereditary Disorder,Organismal Injury and Abnormalities,Skeletal and Muscular Disorders	Acrocephalopolysyndactyly type II	0.00536			RAB23	1
Hereditary Disorder,Ophthalmic Disease,Organismal Injury and Abnormalities	Retinitis pigmentosa type 60	0.00536			PRPF6	1
Hereditary Disorder,Neurological Disease,Organismal Injury and Abnormalities,Psychological Disorders	Frontotemporal dementia and/or amyotrophic lateral sclerosis type 3	0.00536			SQSTM1	1
Cell Morphology,Cellular Function and Maintenance	Transmembrane potential of epithelial cell lines	0.00536			KCNJ10	1
Developmental Disorder,Hereditary Disorder,Organismal Injury and Abnormalities,Renal and Urological Disease	Nephronophthisis-like nephropathy type 1	0.00536			XPNPEP3	1
Auditory Disease,Developmental Disorder,Hereditary Disorder,Neurological Disease,Organismal Injury and Abnormalities	Seizures, sensorineural deafness, ataxia, mental retardation, and electrolyte imbalance	0.00536			KCNJ10	1
Lipid Metabolism,Molecular Transport,Small Molecule Biochemistry	Localization of lysobisphosphatidic acid	0.00536			RAB22A	1
Developmental Disorder,Hereditary Disorder,Metabolic Disease,Neurological Disease,Organismal Injury and Abnormalities,Psychological Disorders	Mild Canavan disease	0.00536			ASPA	1
Cellular Assembly and Organization	Binding of actin stress fibers	0.00536			MAPRE1	1
Connective Tissue Disorders,Developmental Disorder,Hereditary Disorder,Neurological Disease,Organismal Injury and Abnormalities,Skeletal and Muscular Disorders,Tissue Morphology	Spinal muscular atrophy with congenital bone fractures 2	0.00536			ASCC1	1
Carbohydrate Metabolism,Lipid Metabolism,Small Molecule Biochemistry	Activation of phosphatidylinositol 4,5-diphosphate	0.00536			PIKFYVE	1
Cardiovascular Disease,Hereditary Disorder,Organismal Injury and Abnormalities,Respiratory Disease	Primary pulmonary hypertension with hereditary hemorrhagic telangiectasia 1	0.00536			BMPR2	1
Cellular Assembly and Organization	Adhesion of phosphatidylserine vesicles	0.00536			APOH	1
Lipid Metabolism,Molecular Transport,Small Molecule Biochemistry	Release of 11,12-epoxyeicosatrienoic acid	0.00536			POMC	1
Carbohydrate Metabolism,Lipid Metabolism,Small Molecule Biochemistry	Conversion of phosphtidylinositol 5-phosphate	0.00536			PIKFYVE	1
Cardiovascular Disease,Hereditary Disorder,Organismal Injury and Abnormalities,Respiratory Disease	Pulmonary venoocclusive disease type 1	0.00536			BMPR2	1
Cellular Compromise,Neurological Disease	Degeneration of oligodendrocytes	0.00536			ASPA	1
Hematological System Development and Function,Humoral Immune Response,Lymphoid Tissue Structure and Development,Tissue Morphology	Quantity of mantle zone B cells	0.00536			KIDINS220	1
Cell Cycle,Renal and Urological System Development and Function	Mitogenesis of kidney cell lines	0.00536			PIKFYVE	1
Cell Death and Survival,Cellular Compromise,Organismal Injury and Abnormalities,Skeletal and Muscular Disorders	Atrophy of type IIb muscle fibers	0.00536			USP19	1
Developmental Disorder,Hereditary Disorder,Neurological Disease,Ophthalmic Disease,Organismal Injury and Abnormalities	Poretti-Boltshauser syndrome	0.00536			LAMA1	1
Hematological Disease,Metabolic Disease,Organismal Injury and Abnormalities	Hypocortisolemia	0.00536			POMC	1
Cellular Development,Hematological System Development and Function	Inactivation of granulocytes	0.00536			POMC	1
Cell Cycle,Gene Expression	Binding of STAT-3/STAT-6 binding site	0.00536			POMC	1
Carbohydrate Metabolism,Lipid Metabolism,Molecular Transport,Small Molecule Biochemistry	Accumulation of phosphtidylinositol 5-phosphate	0.00536			PIKFYVE	1
Cellular Development,Cellular Growth and Proliferation,Nervous System Development and Function,Organ Development,Tissue Development	Proliferation of neocortical neurons	0.00536			DYRK1A	1
Hereditary Disorder,Metabolic Disease,Organismal Injury and Abnormalities	Deficiency of phosphoserine phosphatase	0.00536			PSPH	1
Developmental Disorder,Hereditary Disorder,Organismal Injury and Abnormalities,Skeletal and Muscular Disorders	Myofibrillar myopathy 2	0.00536			CRYAB	1
Cardiovascular Disease,Hereditary Disorder,Organismal Injury and Abnormalities,Respiratory Disease	Fenfluramine-associated primary pulmonary hypertension	0.00536			BMPR2	1
Cell Morphology,Cellular Assembly and Organization	Diameter of secretory vesicles	0.00536			PTPN9	1
Cardiovascular Disease,Hereditary Disorder,Organismal Injury and Abnormalities,Respiratory Disease	Dexfenfluramine-associated primary pulmonary hypertension	0.00536			BMPR2	1
Cell Cycle	Entry into S phase of lactotropes	0.00536			POMC	1
Carbohydrate Metabolism,Lipid Metabolism,Small Molecule Biochemistry	Phosphorylation of phosphatidylinositol 3,5-diphosphate	0.00536			PIKFYVE	1
Cancer,Dermatological Diseases and Conditions,Organismal Injury and Abnormalities	Clark's level 5 advanced cutaneous melanoma	0.00536			KIDINS220	1
Lipid Metabolism,Molecular Transport,Small Molecule Biochemistry	Release of 8,9-epoxyeicosatrienoic acid	0.00536			POMC	1
Hereditary Disorder,Neurological Disease,Organismal Injury and Abnormalities	Familial focal epilepsy with variable foci 4	0.00536			SCN3A	1
Hereditary Disorder,Neurological Disease,Organismal Injury and Abnormalities,Skeletal and Muscular Disorders	Autosomal recessive distal spinal muscular atrophy type 5	0.00536			DNAJB2	1
Cancer,Dermatological Diseases and Conditions,Organismal Injury and Abnormalities	Clark's level 5 primary cutaneous melanoma	0.00536			KIDINS220	1
Gastrointestinal Disease,Organismal Injury and Abnormalities	Bleeding of intestinal mucosa	0.00536			BMPR2	1
Cellular Development,Connective Tissue Development and Function	Delay in initiation of adipogenesis of fibroblast cell lines	0.00536			PIKFYVE	1
Cellular Assembly and Organization	Quantity of intraluminal vesicles	0.00536			PIKFYVE	1
Developmental Disorder,Hereditary Disorder,Metabolic Disease,Organismal Injury and Abnormalities	Nuclear type 4 mitochondrial complex III deficiency	0.00536			UQCRQ	1
Cell Morphology	Area of microvilli	0.00536			POMC	1
Hematological System Development and Function	Prothrombin time of plasma	0.00536			APOH	1
Behavior	Huddling	0.00536			DVL1	1
Cell Death and Survival,Cellular Compromise,Organismal Injury and Abnormalities,Skeletal and Muscular Disorders	Atrophy of slow-twitch muscle fibers	0.00536			USP19	1
Hereditary Disorder,Nutritional Disease,Organismal Injury and Abnormalities	Susceptibility to early-onset obesity	0.00536			POMC	1
Developmental Disorder,Hematological Disease,Hereditary Disorder,Immunological Disease,Metabolic Disease,Neurological Disease,Ophthalmic Disease,Organismal Injury and Abnormalities	3-methylglutaconic aciduria with cataracts, neurologic involvement, and neutropenia	0.00536			CLPB	1
Connective Tissue Disorders,Developmental Disorder,Gastrointestinal Disease,Hereditary Disorder,Immunological Disease,Organismal Injury and Abnormalities,Skeletal and Muscular Disorders	Trichohepatoenteric syndrome type 2	0.00536			SKIV2L	1
Cellular Movement	Invasion by smooth muscle cell lines	0.00536			CRYAB	1
Developmental Disorder,Hereditary Disorder,Metabolic Disease,Organismal Injury and Abnormalities,Renal and Urological Disease	Maple syrup urine disease type 1B	0.00536			BCKDHB	1
Hematological Disease,Hereditary Disorder,Organismal Injury and Abnormalities	Alpha-2-macroglobulin deficiency	0.00536			A2M	1
Cell Morphology,Cellular Assembly and Organization	Enlargement of late endosomes	0.00536			PIKFYVE	1
Cell Morphology,Cell-To-Cell Signaling and Interaction,Cellular Function and Maintenance,Nervous System Development and Function,Visual System Development and Function	Depolarization of Muller glia	0.00536			KCNJ10	1
Cellular Assembly and Organization	Anchoring of centrosome	0.00536			MAPRE1	1
Cell Cycle	Entry into quiescence of tumor cell lines	0.00536			DYRK1A	1
Cell-To-Cell Signaling and Interaction,Endocrine System Development and Function	Activation of endocrine cell lines	0.00536			POMC	1
Cellular Assembly and Organization	Complexity of microvilli	0.00536			POMC	1
Developmental Disorder,Hereditary Disorder,Ophthalmic Disease,Organismal Injury and Abnormalities	Fleck corneal dystrophy	0.00536			PIKFYVE	1
Developmental Disorder,Hereditary Disorder,Neurological Disease,Organismal Injury and Abnormalities	Early infantile epileptic encephalopathy type 25	0.00536			SLC13A5	1
Carbohydrate Metabolism,Lipid Metabolism,Small Molecule Biochemistry	Binding of 1,2-dioleoylphosphatidylserine	0.00536			APOH	1
Developmental Disorder,Hereditary Disorder,Neurological Disease,Organismal Injury and Abnormalities	Autosomal dominant mental retardation type 7	0.00536			DYRK1A	1
Connective Tissue Disorders,Developmental Disorder,Hereditary Disorder,Metabolic Disease,Organismal Injury and Abnormalities,Skeletal and Muscular Disorders	Paget disease of bone 3	0.00536			SQSTM1	1
Cardiovascular Disease,Hematological Disease,Organismal Injury and Abnormalities,Respiratory Disease	Arterial thrombosis of lung	0.00536			BMPR2	1
Hereditary Disorder,Neurological Disease,Organismal Injury and Abnormalities	Childhood-onset neurodegeneration with ataxia, dystonia, and gaze palsy	0.00536			SQSTM1	1
Neurological Disease,Skeletal and Muscular Disorders	Peripheral motor weakness	0.00536			SQSTM1	1
Cell Death and Survival	Opsonization of cardiomyocytes	0.00536			APOH	1
Cell Morphology	Cellularity of pro-B lymphocytes	0.00536			ACTL6A	1
Drug Metabolism	Binding of glutathione	0.00536			GSTZ1	1
Cancer,Hematological Disease,Hereditary Disorder,Organismal Injury and Abnormalities	Bone marrow failure syndrome type 1	0.00536			SRP72	1
Hereditary Disorder,Metabolic Disease,Organismal Injury and Abnormalities	Combined oxidative phosphorylation deficiency 24	0.00536			NARS2	1
Cell Morphology,Cellular Assembly and Organization	Morphology of desmin filament	0.00536			CRYAB	1
Nervous System Development and Function	Adaptation of hair cells	0.00536			MYO1B	1
Developmental Disorder,Hereditary Disorder,Neurological Disease,Nutritional Disease,Ophthalmic Disease,Organismal Injury and Abnormalities,Skeletal and Muscular Disorders	Spastic paraplegia, intellectual disability, nystagmus, and obesity	0.00536			KIDINS220	1
Connective Tissue Disorders,Developmental Disorder,Hereditary Disorder,Immunological Disease,Inflammatory Disease,Inflammatory Response,Metabolic Disease,Organismal Injury and Abnormalities,Renal and Urological Disease,Skeletal and Muscular Disorders	Familial juvenile hyperuricemic nephropathy type 4	0.00536			SEC61A1	1
Cardiovascular System Development and Function,Organismal Development	Development of sinusoid	0.00536			LAMA1	1
Embryonic Development,Organismal Development,Tissue Development	Development of Reichert's membrane	0.00536			LAMA1	1
Cell Cycle,Connective Tissue Development and Function	G0/S phase transition of fibroblasts	0.00536			NELFB	1
Cellular Movement,Hematological System Development and Function,Immune Cell Trafficking,Inflammatory Response	Transmigration of monocyte-derived macrophages	0.00536			BMPR2	1
Cell-To-Cell Signaling and Interaction,Cellular Growth and Proliferation,Endocrine System Development and Function	Induction of adrenocortical cells	0.00536			POMC	1
Amino Acid Metabolism,Small Molecule Biochemistry	Metabolism of amino acids	0.00664			ASPA,BCKDHB,GSTZ1,MSRA,PSPH	5
Cell-To-Cell Signaling and Interaction,Hematological System Development and Function,Immune Cell Trafficking,Inflammatory Response	Activation of peritoneal macrophages	0.00668			APOH,POMC	2
Nervous System Development and Function,Neurological Disease,Organ Morphology,Tissue Morphology	Abnormal morphology of white matter	0.00726			KCNJ10,PTPN9	2
Cellular Assembly and Organization,Cellular Function and Maintenance	Organization of cytoplasmic microtubule	0.00726			DVL1,HOOK3	2
Cancer,Endocrine System Disorders,Organismal Injury and Abnormalities	Metastatic advanced papillary thyroid carcinoma	0.00787			LIMD2,SYT12	2
Developmental Disorder,Embryonic Development,Organismal Development,Tissue Morphology	Lack of primitive streak	0.00849			BMPR2,RAB10	2
Cellular Movement	Movement of eye cell lines	0.00849			A2M,MAPRE1	2
Post-Translational Modification	Aggregation of protein	0.00981			CRYAB,SQSTM1	2
Organismal Injury and Abnormalities	Oxidative stress	0.0104			GSTZ1,MSRA,SQSTM1	3
Cell Morphology,Cellular Compromise	Vacuolation of cells	0.0105			KCNJ10,PIKFYVE	2
Cellular Assembly and Organization	Formation of early endosomes	0.0107			PIKFYVE	1
Cellular Movement,Organismal Injury and Abnormalities,Renal and Urological Disease,Tissue Morphology	Breakdown of glomerular basement membrane	0.0107			LAMA1	1
Connective Tissue Development and Function,Tissue Development	Accumulation of subcutaneous fat	0.0107			POMC	1
Carbohydrate Metabolism,Molecular Transport,Small Molecule Biochemistry	Abnormal quantity of glycerol	0.0107			SLC13A5	1
Cell-To-Cell Signaling and Interaction,Cellular Growth and Proliferation,Hair and Skin Development and Function	Stimulation of melanocytes	0.0107			POMC	1
Auditory and Vestibular System Development and Function,Auditory Disease,Organ Morphology,Organismal Development,Organismal Injury and Abnormalities	Abnormal morphology of distended Reissner's membrane	0.0107			KCNJ10	1
Cell Cycle	Aneuploidy of lung cancer cell lines	0.0107			SQSTM1	1
Infectious Diseases	Replication of poliovirus	0.0107			GABARAPL1	1
Developmental Disorder,Embryonic Development,Organismal Development,Tissue Morphology	Lack of Reichert's membrane	0.0107			LAMA1	1
Amino Acid Metabolism,Energy Production,Post-Translational Modification,Small Molecule Biochemistry	Oxidation of L-methionine	0.0107			MSRA	1
Cancer,Organismal Injury and Abnormalities	Metastasis of skin cell lines	0.0107			SQSTM1	1
Cell Morphology,Cellular Compromise,Connective Tissue Development and Function	Vacuolation of fibroblast cell lines	0.0107			PIKFYVE	1
Hereditary Disorder,Neurological Disease,Organismal Injury and Abnormalities,Skeletal and Muscular Disorders	Axonal Charcot-Marie-Tooth disease type 2T	0.0107			DNAJB2	1
Embryonic Development,Organismal Development	Initiation of gastrulation	0.0107			LAMA1	1
Neurological Disease,Organismal Injury and Abnormalities	Cold-induced sweating syndrome 1	0.0107			CRLF1	1
Carbohydrate Metabolism,Lipid Metabolism,Small Molecule Biochemistry	Conversion of phosphatidylinositol-3-phosphate	0.0107			PIKFYVE	1
Hereditary Disorder,Metabolic Disease,Organismal Injury and Abnormalities,Skeletal and Muscular Disorders	Myopathy with exercise intolerance swedish type	0.0107			ISCU	1
Nervous System Development and Function,Organ Morphology,Organismal Development	Size of superior colliculus	0.0107			DYRK1A	1
Cell-To-Cell Signaling and Interaction,Nervous System Development and Function	Activation of oxytocin neurons	0.0107			POMC	1
Hair and Skin Development and Function,Organ Morphology	Yellowness of fur	0.0107			POMC	1
Organ Morphology,Organismal Development,Tissue Morphology	Morphology of adrenal cortex tissue	0.0107			POMC	1
Neurological Disease,Organismal Injury and Abnormalities	Astrocytosis of anterior horn of the spinal cord	0.0107			SQSTM1	1
Cellular Assembly and Organization	Quantity of microfilaments	0.0107			POMC	1
Cancer,Cardiovascular Disease,Connective Tissue Disorders,Organismal Injury and Abnormalities,Respiratory Disease	Pulmonary lymphangioleiomyomatosis	0.0107			CRYAB	1
Cell Cycle	Cell division of macrophages	0.0107			A2M	1
Cellular Assembly and Organization	Binding of spindle fibers	0.0107			MAPRE1	1
Cell-To-Cell Signaling and Interaction,Cellular Assembly and Organization,Cellular Function and Maintenance	Maintenance of tight junctions	0.0107			A2M	1
Endocrine System Development and Function,Lipid Metabolism,Small Molecule Biochemistry	Stimulation of aldosterone	0.0107			POMC	1
Developmental Disorder,Neurological Disease	Meningomyelocele	0.0107			PTPN9	1
Cellular Assembly and Organization	Redistribution of endosomes	0.0107			RAB22A	1
Developmental Disorder,Neurological Disease,Organismal Injury and Abnormalities,Skeletal and Muscular Disorders	Developmental delay and generalized hypotonia and cerebellar ataxia	0.0107			LAMA1	1
Cardiovascular Disease,Hereditary Disorder,Organismal Injury and Abnormalities,Skeletal and Muscular Disorders	Desmin-related myopathy	0.0107			CRYAB	1
Neurological Disease,Organismal Injury and Abnormalities,Psychological Disorders	Spongy degeneration of central nervous system of white matter	0.0107			ASPA	1
Cellular Function and Maintenance,Nervous System Development and Function	Regulation of cholinergic neurons	0.0107			POMC	1
Cell Morphology,Cellular Assembly and Organization	Morphology of endocytotic vesicle	0.0107			PIKFYVE	1
Carbohydrate Metabolism,Lipid Metabolism,Small Molecule Biochemistry	Upregulation of phosphatidylinositol 3,5-diphosphate	0.0107			PIKFYVE	1
Connective Tissue Disorders,Developmental Disorder,Neurological Disease,Organismal Injury and Abnormalities,Skeletal and Muscular Disorders	Encephalocele	0.0107			PTPN9	1
Cell Morphology,Cell-To-Cell Signaling and Interaction,Cellular Function and Maintenance,Nervous System Development and Function	Depolarization of astrocytes	0.0107			KCNJ10	1
Organ Morphology	Contraction of stomach	0.0107			POMC	1
Infectious Diseases	Release of poliovirus	0.0107			GABARAPL1	1
Hair and Skin Development and Function	Melanogenesis of melanocytes	0.0107			POMC	1
Cell Death and Survival	Disintegration of secondary lens fiber cells	0.0107			CRYAB	1
Small Molecule Biochemistry	Metabolism of acetate	0.0107			ASPA	1
Cell-To-Cell Signaling and Interaction,Nervous System Development and Function	Endocannabinoid-dependent long-term depression of synapse	0.0107			DYRK1A	1
Cardiovascular Disease,Organ Morphology,Organismal Injury and Abnormalities,Renal and Urological Disease	Distension of glomerular capillary	0.0107			LAMA1	1
Amino Acid Metabolism,Small Molecule Biochemistry	Catabolism of amino acids	0.0125			ASPA,BCKDHB,GSTZ1	3
Infectious Diseases	Replication of Retroviridae	0.013			DYRK1A,EXOSC5,PIKFYVE,SQSTM1	4
Nutritional Disease	Adult-onset obesity	0.0143			SLC13A5,SQSTM1	2
Cardiovascular Disease,Hematological Disease,Organismal Injury and Abnormalities	Thrombosis of artery	0.0143			APOH,BMPR2	2
Cellular Assembly and Organization	Formation of vacuole	0.0149			PIKFYVE,RAB22A,RAB23	3
Cellular Assembly and Organization,Cellular Compromise	Formation of cellular inclusion bodies	0.0149			CRYAB,DNAJB2,SQSTM1	3
Hereditary Disorder,Organismal Injury and Abnormalities,Skeletal and Muscular Disorders	Autosomal recessive myopathy	0.0149			ASCC1,CRYAB,DNAJB2,ISCU,SQSTM1	5
Embryonic Development,Organismal Development,Tissue Morphology	Morphology of ectoderm	0.0151			PIKFYVE,RAB10	2
Cellular Assembly and Organization,Cellular Function and Maintenance	Organization of endosomes	0.0151			HOOK3,SQSTM1	2
Cellular Growth and Proliferation	Outgrowth of cells	0.0154		0.805	A2M,CRYAB,DVL1,DYRK1A,LAMA1,RAB22A,RAB33A,SNX1	8
Hereditary Disorder,Nutritional Disease,Organismal Injury and Abnormalities	Familial obesity	0.0159			KIDINS220,POMC	2
Hair and Skin Development and Function,Organ Morphology	Morphology of fur	0.0159			POMC,SQSTM1	2
Cellular Compromise	Degradation of peroxisomes	0.016			SQSTM1	1
Molecular Transport	Quantity of acetate	0.016			ASPA	1
Developmental Disorder,Hereditary Disorder,Metabolic Disease,Organismal Injury and Abnormalities	Nuclear type 1 mitochondrial complex III deficiency	0.016			UQCRQ	1
Cancer,Cellular Development,Cellular Growth and Proliferation,Organismal Injury and Abnormalities,Tumor Morphology	Colony formation of leukemia stem cells	0.016			SQSTM1	1
Cardiovascular System Development and Function	Perfusion of adrenal gland	0.016			POMC	1
Cell Signaling,Nucleic Acid Metabolism,Small Molecule Biochemistry	Induction of cyclic AMP	0.016			POMC	1
Cell Cycle	Aneuploidy of carcinoma cell lines	0.016			SQSTM1	1
Cell-To-Cell Signaling and Interaction	Activation of bone marrow cell lines	0.016			APOH	1
Cellular Growth and Proliferation	Colony formation of mesothelioma cell lines	0.016			DVL1	1
Cell Signaling,Molecular Transport,Nucleic Acid Metabolism,Small Molecule Biochemistry	Secretion of cyclic AMP	0.016			POMC	1
Cellular Assembly and Organization	Translocation of Golgi vesicles	0.016			PCLO	1
Cellular Development	Epithelial to mesenchymal transdifferentiation of lung cancer cell lines	0.016			BMPR2	1
Cell Morphology	Polarity of eye cell lines	0.016			MAPRE1	1
Developmental Disorder,Hereditary Disorder,Organismal Injury and Abnormalities	Autosomal dominant Robinow syndrome type 2	0.016			DVL1	1
Neurological Disease,Organismal Injury and Abnormalities	Neurodegeneration of spinal cord	0.016			SQSTM1	1
Lipid Metabolism,Small Molecule Biochemistry	Binding of cardiolipin	0.016			APOH	1
Amino Acid Metabolism,Small Molecule Biochemistry	Catabolism of L-tyrosine	0.016			GSTZ1	1
Cellular Compromise	Disassembly of Golgi apparatus	0.016			ACBD3	1
Auditory Disease,Developmental Disorder,Endocrine System Disorders,Hereditary Disorder,Metabolic Disease,Neurological Disease,Organismal Injury and Abnormalities	Pendred syndrome	0.016			KCNJ10	1
Cellular Development	Epithelial to mesenchymal transdifferentiation of carcinoma cell lines	0.016			BMPR2	1
Endocrine System Development and Function,Lipid Metabolism,Small Molecule Biochemistry	Stimulation of glucocorticoid	0.016			POMC	1
Amino Acid Metabolism,Small Molecule Biochemistry	Catabolism of L-aspartic acid	0.016			ASPA	1
Tissue Morphology	Breakdown of elastic tissue	0.016			A2M	1
Lipid Metabolism,Molecular Transport,Small Molecule Biochemistry	Transport of succinic acid	0.016			SLC13A5	1
Cellular Movement,Nervous System Development and Function	Chemorepulsion of sensory neurons	0.016			A2M	1
Cardiovascular Disease,Hereditary Disorder,Organismal Injury and Abnormalities,Skeletal and Muscular Disorders	Familial restrictive cardiomyopathy 1	0.016			CRYAB	1
Cell Cycle	Cell cycle progression of bladder cancer cell lines	0.016			PIKFYVE	1
Cell Morphology,Cellular Development,Tissue Development	Tubulation of liver cell lines	0.016			DVL1	1
Drug Metabolism,Endocrine System Development and Function,Lipid Metabolism,Molecular Transport,Small Molecule Biochemistry	Release of hydrocortisone	0.016			POMC	1
Auditory Disease,Hereditary Disorder,Neurological Disease,Organismal Injury and Abnormalities	Autosomal recessive deafness type 4	0.016			KCNJ10	1
Organismal Injury and Abnormalities,Skeletal and Muscular Disorders	Myopathy of gastrocnemius	0.016			SQSTM1	1
Nervous System Development and Function,Organ Morphology,Tissue Morphology	Quantity of cerebellar granule cell	0.016			ASPA	1
Carbohydrate Metabolism,Lipid Metabolism,Small Molecule Biochemistry	Synthesis of phosphatidylinositol 3,5-diphosphate	0.016			PIKFYVE	1
Connective Tissue Disorders,Dermatological Diseases and Conditions,Infectious Diseases,Organismal Injury and Abnormalities	Infection of dermal fibroblasts	0.016			MAPRE1	1
Cell Morphology,Cellular Assembly and Organization	Length of actin stress fibers	0.016			PIKFYVE	1
Cell Morphology	Cell polarity formation by epithelial cells	0.016			LAMA1	1
Cell-To-Cell Signaling and Interaction	Calcium response of nervous tissue cell lines	0.016			POMC	1
Behavior	Whisker trimming	0.016			DVL1	1
Cell Death and Survival,Nervous System Development and Function	Cell survival of hippocampal neurons	0.016			PIKFYVE	1
Cell-To-Cell Signaling and Interaction,Cellular Growth and Proliferation,Endocrine System Development and Function	Stimulation of endocrine cell lines	0.016			POMC	1
Dermatological Diseases and Conditions,Immunological Disease,Organismal Injury and Abnormalities	Strictly segmental vitiligo	0.016			MSRA	1
Molecular Transport,Protein Trafficking	Secretion of green fluorescent protein	0.016			USP19	1
Cellular Development,Cellular Growth and Proliferation,Endocrine System Development and Function,Organ Development	Proliferation of adrenocortical cells	0.016			POMC	1
Cellular Function and Maintenance,Molecular Transport	Influx of K+	0.016			KCNJ10	1
Post-Translational Modification	Farnesylation of protein	0.016			FNTA	1
Molecular Transport	Increased uptake of K+	0.016			KCNJ10	1
Cell Morphology,Nervous System Development and Function,Skeletal and Muscular System Development and Function	Innervation of forelimb	0.016			BMPR2	1
Lipid Metabolism,Small Molecule Biochemistry	Phosphorylation of lipid	0.0168			DGKG,PIKFYVE	2
Cellular Assembly and Organization,Tissue Development	Formation of tubules	0.0168			MYO1B,SNX1	2
Lipid Metabolism,Small Molecule Biochemistry	Regulation of lipid	0.0168			PIKFYVE,POMC	2
Cellular Assembly and Organization,Cellular Function and Maintenance	Stabilization of microtubules	0.0179			CRYAB,DVL1,MAPRE1	3
Cell-To-Cell Signaling and Interaction,Cellular Assembly and Organization,Cellular Development,Cellular Function and Maintenance,Cellular Growth and Proliferation,Nervous System Development and Function,Skeletal and Muscular System Development and Function,Tissue Development	Formation of neuromuscular junctions	0.0185			DVL1,FNTA	2
Protein Degradation,Protein Synthesis	Catabolism of protein	0.0187			CRYAB,DVL1,ERLEC1,PJA1,RAB23,SNX1,SQSTM1,USP19,USP4,XPNPEP3	10
Cellular Assembly and Organization,Neurological Disease,Organismal Development,Tissue Development	Formation of amyloid fibrils	0.0194			A2M,CRYAB	2
Cell-To-Cell Signaling and Interaction,Nervous System Development and Function	Activation of neurons	0.0203			FNTA,KCNJ10,POMC	3
Embryonic Development,Organismal Development,Tissue Morphology	Morphology of visceral endoderm	0.0203			LAMA1,SNX1	2
Amino Acid Metabolism,Small Molecule Biochemistry	Metabolism of essential amino acids	0.0203			GSTZ1,MSRA	2
Embryonic Development,Organismal Development	Arrest in growth of embryo	0.0212			BMPR2,NELFB,RAB10,SNX1	4
Gastrointestinal Disease,Hepatic System Disease,Hereditary Disorder,Metabolic Disease,Neurological Disease,Organismal Injury and Abnormalities	Combined oxidative phosphorylation deficiency 1	0.0213			NARS2	1
Nervous System Development and Function,Organ Morphology,Organismal Development	Abnormal size of brain	0.0213			DYRK1A	1
Cardiovascular System Development and Function,Hematological System Development and Function	Pressure of pulmonary artery	0.0213			BMPR2	1
Cell-To-Cell Signaling and Interaction,Hematological System Development and Function,Immune Cell Trafficking,Inflammatory Response	Adhesion of monocyte-derived macrophages	0.0213			APOH	1
Cellular Assembly and Organization,Nervous System Development and Function	Remodeling of axons	0.0213			DVL1	1
Neurological Disease,Organismal Injury and Abnormalities	Demyelination of corpus callosum	0.0213			ASPA	1
Cellular Assembly and Organization	Formation of recycling endosomes	0.0213			RAB22A	1
Cell-To-Cell Signaling and Interaction	Signaling of astrocytes	0.0213			KCNJ10	1
Infectious Diseases	Binding of Lassa virus	0.0213			LAMA1	1
Carbohydrate Metabolism,Nucleic Acid Metabolism,Small Molecule Biochemistry	Metabolism of GDP-D-mannose	0.0213			DPM1	1
Cell Morphology,Cellular Function and Maintenance	Autophagy of Salmonella typhimurium SL1344	0.0213			SQSTM1	1
Amino Acid Metabolism,Post-Translational Modification,Small Molecule Biochemistry	Conversion of citrulline	0.0213			POMC	1
Cell Cycle,Cell Morphology,Cellular Assembly and Organization,Cellular Function and Maintenance,Cellular Movement	Elongation of microtubules	0.0213			MAPRE1	1
Cell Morphology,Cellular Compromise,Hair and Skin Development and Function	Vacuolation of epithelial cell lines	0.0213			PIKFYVE	1
Cell Cycle,Embryonic Development	Mitogenesis of embryonic cell lines	0.0213			PIKFYVE	1
Cellular Assembly and Organization	Stabilization of intermediate filaments	0.0213			CRYAB	1
Cellular Assembly and Organization	Docking of plasma membrane	0.0213			RAB10	1
Cardiovascular Disease,Cardiovascular System Development and Function,Organ Morphology,Organismal Development,Organismal Injury and Abnormalities	Visceromegaly of heart	0.0213			DYRK1A	1
Cell Morphology,Cellular Function and Maintenance,Tissue Morphology	Permeability of connective tissue cells	0.0213			LAMA1	1
Cell Morphology,Cellular Function and Maintenance,Nervous System Development and Function	Transmembrane potential of oligodendrocytes	0.0213			KCNJ10	1
Cellular Development,Hematological System Development and Function	Inactivation of lymphocytes	0.0213			POMC	1
Neurological Disease,Organismal Injury and Abnormalities	Hypomyelination of brain	0.0213			QKI	1
Molecular Transport,RNA Trafficking	Accumulation of mRNA	0.0213			PNN	1
Nervous System Development and Function,Neurological Disease,Organ Morphology,Organismal Development,Organismal Injury and Abnormalities	Abnormal morphology of somatosensory cortex	0.0213			DYRK1A	1
Carbohydrate Metabolism,Lipid Metabolism,Small Molecule Biochemistry	Conversion of phosphatidylinositol 4,5-diphosphate	0.0213			PIKFYVE	1
Endocrine System Disorders,Metabolic Disease,Organismal Injury and Abnormalities,Reproductive System Disease	Adrenocorticotropic hormone (ACTH) deficiency	0.0213			POMC	1
Cardiovascular System Development and Function,Cellular Movement	Migration of pulmonary artery endothelial cells	0.0213			BMPR2	1
Cellular Assembly and Organization	Quantity of cytoplasmic inclusions	0.0213			CRYAB	1
Cell Death and Survival,Hair and Skin Development and Function	Cell survival of epithelial cell lines	0.0213			DYRK1A	1
Cardiovascular Disease,Organismal Injury and Abnormalities	Onset of heart failure	0.0213			CRYAB	1
Cell Morphology,Cellular Assembly and Organization	Size of vacuole	0.0213			PIKFYVE	1
Cellular Assembly and Organization,Cellular Function and Maintenance	Formation of Golgi vesicles	0.0213			PCLO	1
Nutritional Disease	Nonsyndromic monogenic obesity	0.0213			POMC	1
Drug Metabolism,Endocrine System Development and Function,Lipid Metabolism,Small Molecule Biochemistry	Conversion of hydrocortisone	0.0213			POMC	1
Drug Metabolism,Endocrine System Development and Function,Lipid Metabolism,Molecular Transport,Small Molecule Biochemistry	Release of progesterone	0.0213			POMC	1
Carbohydrate Metabolism,Lipid Metabolism,Small Molecule Biochemistry	Synthesis of phosphtidylinositol 5-phosphate	0.0213			PIKFYVE	1
Cell Morphology,Cellular Assembly and Organization,Cellular Development,Cellular Function and Maintenance,Cellular Growth and Proliferation,Embryonic Development,Nervous System Development and Function,Organismal Development,Tissue Development	Branching of sensory axons	0.0213			A2M	1
Carbohydrate Metabolism	Phosphorylation of carbohydrate	0.0213			NAGK,PIKFYVE	2
Cellular Development,Cellular Growth and Proliferation,Nervous System Development and Function,Tissue Development	Development of oligodendrocytes	0.0222			ASPA,KCNJ10	2
Cardiovascular Disease,Organismal Injury and Abnormalities	Vascular leak syndrome	0.0232			BMPR2,CRYAB	2
Cell-To-Cell Signaling and Interaction	Calcium response of cells	0.0232			KCNJ10,POMC	2
Hereditary Disorder,Neurological Disease,Organismal Injury and Abnormalities	Familial motor neuron disease	0.0239			ASCC1,DNAJB2,SQSTM1	3
Auditory and Vestibular System Development and Function,Auditory Disease,Organ Morphology,Organismal Development,Organismal Injury and Abnormalities	Abnormal morphology of cochlear duct	0.0242			DVL1,KCNJ10	2
Cellular Assembly and Organization,Tissue Development	Formation of fibrils	0.0242			A2M,CRYAB	2
Cellular Assembly and Organization	Binding of filaments	0.0252			KPNA1,MAPRE1	2
Cellular Development,Cellular Growth and Proliferation,Nervous System Development and Function,Tissue Development	Growth of neurites	0.0255		1.424	A2M,DVL1,DYRK1A,LAMA1,PPP2R2D,RAB22A,RAB33A,SNX1	8
Developmental Disorder,Neurological Disease,Organismal Injury and Abnormalities	Hypoplasia of cerebellum	0.0263			LAMA1,PCLO	2
Hereditary Disorder,Neurological Disease,Organismal Injury and Abnormalities,Skeletal and Muscular Disorders	Spinal muscular atrophy	0.0263			ASCC1,DNAJB2	2
Cellular Development,Cellular Growth and Proliferation,Nervous System Development and Function,Tissue Development	Outgrowth of neurites	0.0263		1.172	A2M,DVL1,DYRK1A,LAMA1,RAB22A,RAB33A,SNX1	7
Endocrine System Development and Function,Lipid Metabolism,Small Molecule Biochemistry	Stimulation of corticosterone	0.0265			POMC	1
Lipid Metabolism,Small Molecule Biochemistry	Stimulation of phospholipid	0.0265			POMC	1
Gastrointestinal Disease,Hepatic System Disease,Metabolic Disease,Organismal Injury and Abnormalities	Macrovesicular hepatic steatosis	0.0265			GSTZ1	1
Cardiovascular System Development and Function,Cell-To-Cell Signaling and Interaction,Organ Development,Skeletal and Muscular System Development and Function	Activation of cardiomyocytes	0.0265			CRYAB	1
Cell Death and Survival,Hematological System Development and Function	Survival of myeloid progenitor cells	0.0265			ACTL6A	1
Cell Death and Survival,Renal and Urological System Development and Function	Cell survival of kidney cell lines	0.0265			DYRK1A	1
Auditory Disease,Neurological Disease	Mixed nonsyndromic hearing impairment	0.0265			KCNJ10	1
Auditory Disease,Organismal Injury and Abnormalities	Collapse of Reissner's membrane	0.0265			KCNJ10	1
Cell Morphology	Cellularity of T lymphocytes	0.0265			ACTL6A	1
Post-Translational Modification	Repair of protein	0.0265			MSRA	1
Lipid Metabolism,Small Molecule Biochemistry	Composition of lipid	0.0265			ASPA	1
Cell Morphology,Cellular Compromise,Renal and Urological System Development and Function	Vacuolation of kidney cell lines	0.0265			PIKFYVE	1
Amino Acid Metabolism,Molecular Transport,Small Molecule Biochemistry	Import of L-glutamic acid	0.0265			KCNJ10	1
Organismal Injury and Abnormalities	Dysplastic nevus	0.0265			KIDINS220	1
Cell Morphology,Cellular Compromise,Embryonic Development	Vacuolation of embryonic cell lines	0.0265			PIKFYVE	1
Auditory Disease,Cell Death and Survival,Cellular Compromise,Neurological Disease,Organismal Injury and Abnormalities,Tissue Morphology	Degeneration of vestibular hair cells	0.0265			KCNJ10	1
Carbohydrate Metabolism,Lipid Metabolism,Molecular Transport,Small Molecule Biochemistry	Quantity of phosphtidylinositol 5-phosphate	0.0265			PIKFYVE	1
Cancer,Hematological Disease,Organismal Injury and Abnormalities	Advanced stage primary myelofibrosis	0.0265			BMPR2	1
Molecular Transport	Transport of citric acid	0.0265			SLC13A5	1
Cardiovascular System Development and Function,Cell Cycle,Cell-To-Cell Signaling and Interaction,Cellular Growth and Proliferation,Cellular Movement	Contact growth inhibition of endothelial cell lines	0.0265			BMPR2	1
Cellular Assembly and Organization,Cellular Function and Maintenance,Cellular Movement,Nervous System Development and Function	Axonal transport of vesicles	0.0265			RAB33A	1
Cellular Assembly and Organization	Binding of liposome	0.0265			APOH	1
Cellular Assembly and Organization,Neurological Disease,Organismal Development,Tissue Development	Development of amyloid-beta plaques	0.0265			CRYAB	1
Cardiovascular System Development and Function,Tissue Morphology	Thickness of arterial wall	0.0265			BMPR2	1
Antimicrobial Response	Inhibition of Influenza virus	0.0265			A2M	1
Cellular Growth and Proliferation	Accumulation of breast cancer cell lines	0.0265			BMPR2	1
Cell Death and Survival	Degradation of bacteria	0.0265			SQSTM1	1
Cell-To-Cell Signaling and Interaction,Cellular Assembly and Organization	Formation of intercellular channels	0.0265			POMC	1
Cellular Assembly and Organization,Cellular Function and Maintenance	Regrowth of microtubules	0.0265			MAPRE1	1
Cellular Assembly and Organization	Formation of late endosomes	0.0265			PIKFYVE	1
Hematological Disease,Metabolic Disease,Nutritional Disease,Organismal Injury and Abnormalities	Iron overload of serum	0.0265			BMPR2	1
Amino Acid Metabolism,Small Molecule Biochemistry	Catabolism of L-amino acid	0.0273			ASPA,GSTZ1	2
Cellular Function and Maintenance	Internalization by epithelial cell lines	0.0273			CRYAB,POMC	2
Cellular Compromise	Fragmentation of Golgi apparatus	0.0273			HOOK3,RAB22A	2
Gene Expression	Expression of mRNA	0.0276			EIF3K,MRPS7,NELFB,PAIP1,POMC	5
Auditory and Vestibular System Development and Function,Auditory Disease,Organ Morphology,Organismal Development,Organismal Injury and Abnormalities	Abnormal morphology of inner ear	0.029			ABR,DVL1,KCNJ10	3
Organismal Injury and Abnormalities,Skeletal and Muscular Disorders	Atrophy of muscle	0.0294			ASCC1,DNAJB2,SQSTM1,USP19	4
Cellular Function and Maintenance	Internalization by embryonic cell lines	0.0306			CRYAB,POMC	2
Gene Expression,Protein Synthesis	Initiation of translation of mRNA	0.0306			EIF3K,PAIP1	2
Protein Trafficking	Targeting of protein	0.0307			ACOX3,HACL1,SEC61A1,TOMM20	4
Auditory Disease,Neurological Disease,Organismal Injury and Abnormalities	Vestibular disorder	0.0317			ABR,KCNJ10	2
Neurological Disease,Organismal Injury and Abnormalities	Demyelination of cerebellum	0.0317			ASPA	1
Cell Morphology,Cellular Assembly and Organization	Reorientation of centrosome	0.0317			DVL1	1
Cell-To-Cell Signaling and Interaction	Aggregation of neuroblastoma cell lines	0.0317			DNAJB2	1
Cell-To-Cell Signaling and Interaction,Cellular Assembly and Organization,Renal and Urological System Development and Function	Cell-cell adhesion of kidney cell lines	0.0317			DVL1	1
Auditory Disease,Neurological Disease,Organismal Injury and Abnormalities	Degeneration of macula of saccule	0.0317			KCNJ10	1
Post-Translational Modification	Geranylgeranylation of protein	0.0317			FNTA	1
Cellular Development,Cellular Growth and Proliferation,Embryonic Development,Organismal Development,Tissue Development	Development of trophoblast cells	0.0317			LAMA1	1
Nervous System Development and Function,Neurological Disease,Organ Morphology,Organismal Development,Organismal Injury and Abnormalities	Ectopic arrangement of cerebellar granule cell	0.0317			ABR	1
Organismal Injury and Abnormalities,Tissue Morphology	Abnormal morphology of neuroepithelium	0.0317			KCNJ10	1
Neurological Disease,Organismal Injury and Abnormalities,Psychological Disorders,Skeletal and Muscular Disorders	Atypical cerebral palsy	0.0317			SCN3A	1
Ophthalmic Disease,Organismal Injury and Abnormalities	Oxygen-induced retinopathy	0.0317			CRYAB	1
Cell Death and Survival	Killing of fibroblasts	0.0317			MSRA	1
Cancer,Organismal Injury and Abnormalities,Reproductive System Disease	TNM stage T3 prostate cancer	0.0317			BMPR2	1
Nucleic Acid Metabolism,Small Molecule Biochemistry	Synthesis of phosphoadenosine phosphosulfate	0.0317			PAPSS1	1
Lipid Metabolism,Small Molecule Biochemistry,Vitamin and Mineral Metabolism	Metabolism of dolichol	0.0317			DPM1	1
Auditory and Vestibular System Development and Function,Organ Morphology	Quantity of otoliths	0.0317			ABR	1
Lipid Metabolism,Molecular Transport,Small Molecule Biochemistry	Quantity of galactosylceramide	0.0317			QKI	1
Connective Tissue Disorders,Hematological Disease,Infectious Diseases,Inflammatory Disease,Organismal Injury and Abnormalities,Skeletal and Muscular Disorders	Chronic osteomyelitis	0.0317			ACYP2	1
Behavior	Freezing behavior	0.0317			DYRK1A	1
Cancer,Organismal Injury and Abnormalities	Metastasis of epithelial cell lines	0.0317			SQSTM1	1
Amino Acid Metabolism,Post-Translational Modification,Small Molecule Biochemistry	Conversion of arginine	0.0317			POMC	1
Cellular Assembly and Organization	Binding of kinetochores	0.0317			MAPRE1	1
Cellular Assembly and Organization	Association of actin cytoskeleton	0.0317			DVL1	1
Organ Morphology,Organismal Development,Organismal Injury and Abnormalities,Reproductive System Development and Function,Reproductive System Disease	Abnormal morphology of thin myometrium	0.0317			KPNA1	1
Cell-To-Cell Signaling and Interaction	Response of astrocytes	0.0317			KCNJ10	1
Cellular Movement,Hematological System Development and Function,Immune Cell Trafficking,Inflammatory Response	Transendothelial migration of peripheral blood neutrophils	0.0317			BMPR2	1
RNA Post-Transcriptional Modification	Processing of mRNA	0.0342			DNAJC8,DYRK1A,PNN,PRPF6,QKI	5
Developmental Disorder,Hereditary Disorder,Metabolic Disease,Organismal Injury and Abnormalities	Inborn error of amino acid metabolism	0.0347			ASPA,BCKDHB,CLPB	3
Post-Translational Modification	Lipidation of protein	0.0351			DPM1,ZDHHC5	2
Cell-To-Cell Signaling and Interaction,Renal and Urological System Development and Function	Adhesion of kidney cell lines	0.0351			DVL1,PNN	2
Metabolic Disease,Organismal Injury and Abnormalities,Renal and Urological Disease	Organic aciduria	0.0351			BCKDHB,GSTZ1	2
Connective Tissue Disorders,Developmental Disorder,Neurological Disease,Organismal Injury and Abnormalities,Skeletal and Muscular Disorders	Exencephaly	0.0354			DVL1,PTPN9,SNX1	3
Post-Translational Modification	Deubiquitination of protein	0.0362			ACTL6A,TOMM20,USP19,USP4	4
Cellular Function and Maintenance	Internalization by kidney cell lines	0.0363			CRYAB,POMC	2
Auditory and Vestibular System Development and Function	Bodily balance	0.0363			ABR,KCNJ10	2
Cell Death and Survival	Cell death of neuroglia	0.0367			A2M,CRYAB,QKI	3
Cardiovascular System Development and Function	Vasoconstriction of aorta	0.0369			DYRK1A	1
Carbohydrate Metabolism,Lipid Metabolism,Small Molecule Biochemistry	Phosphorylation of phosphatidylinositol-3-phosphate	0.0369			PIKFYVE	1
Neurological Disease	Degeneration of vestibular ganglion	0.0369			KCNJ10	1
Lipid Metabolism,Small Molecule Biochemistry	Regulation of cholesterol	0.0369			POMC	1
Infectious Diseases	Replication of Murine leukemia virus	0.0369			SQSTM1	1
Carbohydrate Metabolism,Lipid Metabolism,Molecular Transport,Small Molecule Biochemistry	Quantity of phosphatidylinositol 3,5-diphosphate	0.0369			PIKFYVE	1
Developmental Disorder,Endocrine System Disorders,Organ Morphology,Organismal Development,Organismal Injury and Abnormalities	Agenesis of adrenal gland	0.0369			POMC	1
Auditory and Vestibular System Development and Function,Auditory Disease,Organ Morphology,Organismal Development,Organismal Injury and Abnormalities	Lack of otoliths	0.0369			ABR	1
Cell Signaling,Nucleic Acid Metabolism,Small Molecule Biochemistry	Incorporation of guanosine 5'-O-(3-thiotriphosphate)	0.0369			RLN3	1
Cellular Development,Cellular Growth and Proliferation,Embryonic Development,Nervous System Development and Function,Organ Development,Organismal Development,Tissue Development	Myelination of spinal neuron	0.0369			KCNJ10	1
Cellular Assembly and Organization,Cellular Function and Maintenance,Hematological System Development and Function	Release of dense granule	0.0369			RANBP10	1
Cardiovascular Disease,Inflammatory Disease,Organismal Injury and Abnormalities	Rheumatic carditis	0.0369			USP4	1
Embryonic Development,Nervous System Development and Function,Neurological Disease,Ophthalmic Disease,Organ Development,Organ Morphology,Organismal Development,Organismal Injury and Abnormalities,Tissue Development,Visual System Development and Function	Abnormal morphology of nerve fiber layer of retina	0.0369			ASPA	1
Drug Metabolism,Molecular Transport	Release of glutathione	0.0369			GSTZ1	1
Cellular Compromise	Breakdown of actin stress fibers	0.0369			PIKFYVE	1
Organismal Injury and Abnormalities,Reproductive System Disease	Dystocia	0.0369			KPNA1	1
Cardiovascular Disease,Organismal Injury and Abnormalities,Respiratory Disease	Pulmonary arterial hypertension associated with congenital heart disease	0.0369			BMPR2	1
Cardiovascular System Development and Function,Organismal Development,Tissue Morphology	Quantity of artery	0.0369			BMPR2	1
Tissue Development	Calcification of extracellular matrix	0.0369			BMPR2	1
Cell Death and Survival	Cell survival of neuroblastoma cell lines	0.0369			SARAF	1
Cell Death and Survival,Cellular Assembly and Organization,Cellular Development,Nervous System Development and Function,Tissue Development,Tissue Morphology	Regeneration of sensory axons	0.0369			A2M	1
Lipid Metabolism,Molecular Transport,Small Molecule Biochemistry	Transport of triacylglycerol	0.0369			APOH	1
Cell-To-Cell Signaling and Interaction,Nervous System Development and Function	Activation of CA1 neuron	0.0369			KCNJ10	1
Auditory Disease,Organismal Injury and Abnormalities	Degeneration of macula of utricle	0.0369			KCNJ10	1
Cellular Assembly and Organization	Clustering of synaptic vesicles	0.0369			PCLO	1
Developmental Disorder,Embryonic Development,Organismal Development,Tissue Morphology	Abnormal morphology of parietal endoderm	0.0369			LAMA1	1
Cell Cycle	Arrest in G1 phase of hepatoma cell lines	0.0369			SLC13A5	1
Auditory and Vestibular System Development and Function,Auditory Disease,Organ Morphology,Organismal Development,Organismal Injury and Abnormalities	Abnormal morphology of enlarged otoliths	0.0369			ABR	1
Cell Morphology,Cellular Assembly and Organization	Size of autophagosomes	0.0369			GABARAPL1	1
Energy Production,Lipid Metabolism,Nucleic Acid Metabolism,Small Molecule Biochemistry	Oxidation of palmitoyl-coenzyme A	0.0369			ACOX3	1
Cell Morphology,Cellular Function and Maintenance	Macroautophagy of cells	0.0381			GABARAPL1,SQSTM1,TOMM20	3
Protein Degradation,Protein Synthesis	Stabilization of protein	0.0397			CRYAB,DVL1,USP19,USP4	4
Gene Expression,RNA Damage and Repair,RNA Post-Transcriptional Modification	Stabilization of mRNA	0.0402			EXOSC5,PAIP1,QKI	3
Cancer,Gastrointestinal Disease,Organismal Injury and Abnormalities	Malignant neoplasm of large intestine	0.0416			A2M,ABR,ACBD3,ACOX3,BMPR2,CCDC85A,CCDC91,CENPP,CLPB,CRLF1,CRYAB,DGKG,DNAJB2,DPM1,DVL1,DYRK1A,EIF3K,ELFN2,FARSA,FNTA,GABARAPL1,GLTP,GSTZ1,HACL1,HBS1L,HOOK3,KCNJ10,KCNJ16,KIDINS220,LAMA1,MAN2A2,MAPRE1,MSRA,MYO1B,N4BP1,NARS2,PAIP1,PALM3,PAPSS1,PCLO,PIKFYVE,PJA1,PLBD2,PLP2,PNN,POMC,PPP2R2D,PRPF6,PSPH,PTPN9,PYROXD2,QKI,RAB10,RAB22A,RAB33A,RENBP,RFX2,SCN3A,SCRN2,SCRN3,SEC61A1,SH2D5,SKIV2L,SLC13A5,SMYD5…	80
Neurological Disease	Ataxia	0.0418			ASPA,KCNJ10,LAMA1,SCN3A,SQSTM1	5
Molecular Transport,Small Molecule Biochemistry	Quantity of melanin	0.0421			POMC	1
Endocrine System Disorders,Organismal Injury and Abnormalities	Addison disease	0.0421			POMC	1
Developmental Disorder,Embryonic Development,Organismal Development,Tissue Morphology	Lack of embryoblast	0.0421			NELFB	1
Cancer,Organismal Injury and Abnormalities	Melanoma in situ	0.0421			KIDINS220	1
Cellular Assembly and Organization,Cellular Function and Maintenance	Movement of lysosome	0.0421			MYO1B	1
Carbohydrate Metabolism,Lipid Metabolism,Small Molecule Biochemistry	Production of phosphatidylinositol-3-phosphate	0.0421			PIKFYVE	1
Cardiovascular System Development and Function,Cellular Development,Organismal Development,Tissue Development	Differentiation of lymphatic endothelial cells	0.0421			BMPR2	1
Cellular Compromise,Neurological Disease,Organismal Injury and Abnormalities	Dysfunction of neurons	0.0421			DNAJB2	1
Cellular Assembly and Organization	Quantity of macropinosomes	0.0421			SNX1	1
Energy Production,Lipid Metabolism,Small Molecule Biochemistry	Alpha-oxidation of fatty acid	0.0421			HACL1	1
Cellular Assembly and Organization,Tissue Development	Formation of membrane tubule	0.0421			SNX1	1
Cell Signaling,Small Molecule Biochemistry,Vitamin and Mineral Metabolism	Induction of Ca2+	0.0421			POMC	1
Cell Morphology	Cell rounding of neuroblastoma cell lines	0.0421			SH2D5	1
Carbohydrate Metabolism,Lipid Metabolism,Small Molecule Biochemistry	Synthesis of phosphatidylinositol	0.0423			DPM1,PIKFYVE,POMC	3
Cell Death and Survival	Apoptosis of endothelial cell lines	0.0436			BMPR2,DVL1	2
Cellular Function and Maintenance	Hyperpolarization	0.0436			KCNJ10,POMC	2
Cellular Function and Maintenance,Molecular Transport	Exocytosis by cells	0.0438			PCLO,STXBP6,SYTL5	3
Carbohydrate Metabolism	Uptake of monosaccharide	0.0448		1.982	A2M,PIKFYVE,POMC,RAB10,SQSTM1	5
Cardiovascular System Development and Function,Hematological System Development and Function	Pressure of heart ventricle	0.0462			BMPR2,CRYAB	2
Cellular Assembly and Organization,Cellular Function and Maintenance	Localization of Golgi apparatus	0.0472			HOOK3	1
Cardiovascular System Development and Function,Organ Morphology,Organismal Development	Thickness of left ventricle	0.0472			DVL1	1
Infectious Diseases	Infection by Marburg virus	0.0472			DNAJB2	1
Neurological Disease	Abnormal response by axons	0.0472			KCNJ16	1
Gastrointestinal Disease,Hematological Disease,Hepatic System Disease,Metabolic Disease,Nutritional Disease,Organismal Injury and Abnormalities	Iron overload of liver	0.0472			BMPR2	1
Cell Death and Survival,Embryonic Development	Cell survival of embryonic cell lines	0.0472			DYRK1A	1
Nervous System Development and Function	Ensheathment of axons	0.0472			QKI	1
Cellular Function and Maintenance,Hair and Skin Development and Function	Melanogenesis of melanoma cell lines	0.0472			POMC	1
Cellular Function and Maintenance	Engulfment of lymphoma cell lines	0.0472			APOH	1
Nervous System Development and Function,Neurological Disease	Abnormal morphology of cochlear nerve	0.0472			KCNJ10	1
Drug Metabolism,Endocrine System Development and Function,Lipid Metabolism,Molecular Transport,Small Molecule Biochemistry	Concentration of hydrocortisone	0.0472			POMC	1
Cardiovascular Disease,Organismal Injury and Abnormalities	Calcinosis of heart	0.0472			GSTZ1	1
Cellular Development,Cellular Growth and Proliferation	Outgrowth of pheochromocytoma cell lines	0.0472			CRYAB	1
Cellular Assembly and Organization	Formation of punctate structures	0.0472			SQSTM1	1
Vitamin and Mineral Metabolism	Assembly of iron-sulfur	0.0472			ISCU	1
Cell Morphology	Polarity of epithelial cell lines	0.0472			MAPRE1	1
Cell Morphology,Cellular Compromise,Nervous System Development and Function,Neurological Disease,Organismal Injury and Abnormalities,Tissue Morphology	Swelling of axons	0.0472			KCNJ10	1
Metabolic Disease,Organismal Injury and Abnormalities,Renal and Urological Disease	Ketoaciduria	0.0472			GSTZ1	1
Developmental Disorder,Hereditary Disorder,Metabolic Disease,Neurological Disease,Organismal Injury and Abnormalities,Psychological Disorders	Susceptibility to Alzheimer disease	0.0472			A2M	1
Cellular Development,Connective Tissue Development and Function,Skeletal and Muscular System Development and Function,Tissue Development	Differentiation of calvarial cells	0.0472			DYRK1A	1
Infectious Diseases	Transport of virus	0.0475			KPNA1,MAPRE1	2
Neurological Disease,Organismal Injury and Abnormalities	Chronic fatigue syndrome	0.0488			A2M,GABARAPL1	2

## Sheet: Sheet2
		Table SIV. IPA analysis of DEPs. IPA, Ingenuity pathway analysis; DEPs, differentially expressed proteins.
ID	Molecules in Network	Score	Focus Molecules	Top Diseases and Functions
1	ABR,ACBD3,Alp,BCKDHB,BMPR2,BPNT1,CENPP,DLK1,DPM1,DPY19L1,ERK1/2,GOT,GTPase,HTATSF1,KIDINS220,LACTB2,LAMA1,MYEF2,NAGK,NARS2,P-TEFb,PIKFYVE,PJA1,Rab3gap1,RLN3,SH2D5,SIPA1L1,SNAP47,snRNP,TANC2,TBC1D15,TOMM20,WDR41,WIPI2,XPNPEP3	57	29	[Developmental Disorder, Embryonic Development, Organismal Development]
2	A2M,Akap9,APBB1,ASCC1,BBS2,CLPB,CRYAB,DNAJB2,DNAJC13,DNAJC8,DVL1,FAF1,FARSA,FGG,Frizzled,Gsk3,HDL,Histone h4,HSP,Hsp22/Hsp40/Hsp90,Hsp70,Hsp90,LOC100359583/Ptma,MAD1L1,N4BP1,NELFB,NFkB (complex),OTULIN,QKI,RNA polymerase II,SAFB,SMYD5,SPON1,Tgf beta,TNFAIP8	44	24	[Connective Tissue Disorders, Developmental Disorder, Hereditary Disorder]
3	ACSL4,Calmodulin,cytokine,EFTUD2,EIF3K,HMG20A,Ige,Igm,IL12 (family),Immunoglobulin,Insulin,ITM2B,Jnk,KCNJ10,KCNJ16,MYL9,MYO1B,NDUFAF4,P38 MAPK,PCLO,PI3K (complex),Pka,POMC,PTPN9,RAB10,RAB30,RAB39A,RANBP10,RFX2,SNTB2,SNX1,SRP72,SYT12,UQCRQ,USP4	44	24	[Cellular Assembly and Organization, Nervous System Development and Function, Neurological Disease]
4	ADGRG1,ADRB,Alpha tubulin,caspase,CCDC85A,CLASP1,CRLF1,DYRK1A,ERK,FNTA,FSH,GABARAPL1,GCLM,Gpcr,GPRASP1,Histone h3,Lh,Mapk,MAPRE1,MPC1,MSRA,MTX1,NDUFAF5,PDXK,PFDN1,Pkc(s),SEC61A1,SQSTM1,STAT,TCR,TMBIM6,tubulin,Ubiquitin,USP19,Vegf	34	20	[Cell Signaling, Cellular Assembly and Organization, Vitamin and Mineral Metabolism]
5	26s Proteasome,Actin,Akt,AMPK,APOH,ARF3,ARFGEF2,BEX1,EGLN,GABRB1,IgG,ISCU,Ldh (complex),LDL,LRP,MAGI2,Mbp,Mlc,MTOR,MTORC1,NUB1,PDE4B,Pld,PLD3,PP2A,Ppp2c,PPP2R2D,PPP2R5E,PRKAA,SLC13A5,SLC30A1,STAT5a/b,STRN,TOM1,Tsc22d3	32	19	[Cellular Assembly and Organization, Cellular Function and Maintenance, Molecular Transport]
6	CCDC91,CCS,CDK11B,EML4,FANCD2,GFOD1,GOLGA3,HEBP2,HECTD4,HNRNPL,HSPA8,KATNAL1,KPNA1,MFSD10,MRPS26,NEK6,NOL8,PANK2,PRPF6,RALGAPA1,RASEF,RPF1,SCRN2,SERPINA4,SPG7,STT3A,SUN1,TACC3,TBC1D1,TBCD,TBL2,TRAF7,U2af1,YWHAZ,ZNF512	29	18	[Cell Morphology, Cellular Assembly and Organization, DNA Replication, Recombination, and Repair]
7	ABHD14B,ACSL,ACSL6,ACTB,ACTL6A,ATP6V1A,C10orf105,CHCHD10,CSAD,CYBC1,DAPK3,DGKG,DHRS7,ELP1,ERBB2,IL6R,Irgm1,Ldh (complex),LIMD2,MCL1,miR-4651 (and other miRNAs w/seed GGGGUGG),MYH14,MYL9,MYLK2,PAK1,PLP2,PPARD,Ppp1r12b,PYROXD2,RANBP6,SHBG,TTC9B,TTLL12,UBXN6,URM1	27	17	[Cancer, Cell Death and Survival, Organismal Injury and Abnormalities]
8	AMBRA1,ATG13,ATG16L1,BIRC6,CENPP,ELFN2,GABARAPL1,GDI1,GLIPR1L2,GLTP,HECTD4,IARS,KCNJ10,KCNJ16,MAPRE1,OPRK1,PAFAH1B1,PPP1CA,PYGL,RAB10,RAB22A,RAB39A,RASSF5,REXO4,RNF123,SCN3A,TANC2,TBC1D1,TBC1D10B,TBC1D15,TBC1D2,TBC1D5,TMEM160,UBC,USP19	24	14	[Cell Morphology, Cellular Assembly and Organization, Cellular Function and Maintenance]
9	ABR,ADAMTS5,BCKDHB,BMP1,BNIP3,CCDC91,CHAT,Dgk,ENO2,ERBB2,ERLEC1,EWSR1,GH1,GSTZ1,HRAS,HTT,Ldh (complex),MAGEA3/MAGEA6,MARCKSL1,MAX,NAGK,PCLO,PJA1,PNISR,RAB23,RHEB,SH2D5,SNAP47,SYT12,TGIF1,TTC9B,TYRO3,VAMP3,VAMP8,WSB2	22	13	[Cancer, Endocrine System Disorders, Organismal Injury and Abnormalities]
10	ADRA2A,ASPA,BMI1,DNAJC8,DPM1,EGFR,EIF3K,EIF5,elastase,EXOSC5,GDF15,HBS1L,ICAM1,IFIT5,MMP8,NFKB1,NLRP12,NOL6,ORAI1,PAIP1,PAPSS1,PDCD11,PLP2,RAB33A,RASSF5,Rnr,RPF1,SARAF,SKIV2L,SLC13A5,SLC17A2,SNRPA1,TCF7L2,TMEM63A,WDR3	22	13	[Cell Morphology, Digestive System Development and Function, RNA Post-Transcriptional Modification]
11	ACAC,ADRA2A,BEX1,CDH1,CHMP7,Chrm2,DNAJC1,DYRK2,EIF5,ELFN2,EMC7,ESR1,Gpcr,GPR21,IFITM3,KRAS,LSR,MAN1A1,MAP4K5,Mmp,NENF,PALM3,PSPH,RAB23,RENBP,RER1,RNASE4,SSTR5,STXBP6,TBC1D10A,TGFB1,TMEFF1,Trk Receptor,trypsin,ZDHHC5	21	14	[Cancer, Cellular Development, Gastrointestinal Disease]
12	Acox,ACOX3,AMBP,ASPA,CYP2C8,DDX41,DHX8,EIF5,EXOSC5,FAM216A,GFER,GPKOW,GSTZ1,HBS1L,HNF4A,HPX,IL13,Kng1/Kng2,LEPR,MAN1A1,MRPS18C,MRPS2,MRPS7,NOP53,PAPSS1,PLA2G4A,PPIL1,RAB33A,RNASE4,Rnr,SKIV2L,SLC17A2,TCF7L2,ZKSCAN5,ZNF133	21	14	[Amino Acid Metabolism, Lipid Metabolism, Small Molecule Biochemistry]
13	ACYP2,B4GALT6,CASC3,COMMD8,DBNDD2,DFFB,ERLEC1,FBXO6,GAA,LIFR,MAN2A1,MAN2A2,MGAT4C,miR-146a-5p (and other miRNAs w/seed GAGAACU),miR-1911-5p (miRNAs w/seed GAGUACC),miR-3682-3p (miRNAs w/seed GAUGAUA),miR-6832-3p (miRNAs w/seed CCCUUUU),MPPE1,NKAPD1,PAIP1,PLA2G4D,PLBD2,PNN,PPT1,RAB22A,RETSAT,SARAF,SCAF4,SCRN3,SLC13A2,SLC17A2,SMOC1,SRSF8,SYTL5,UBB	21	14	[Cardiovascular System Development and Function, Cellular Assembly and Organization, Cellular Development]
14	26s Proteasome,ADRA2A,ASCC1,Calmodulin,CCDC85A,CLCF1,CNTFR,CRLF1,ERK,Histone h3,Immunoglobulin,ISCU,KPNA1,LIFR,Mapk,MAPKAPK5,MSRA,MTORC1,NDUFAF4,Neurotrophin,NFkB (complex),NLRP12,NOD1,OSBPL10,P38 MAPK,PFDN1,Pkc(s),POMC,RANBP10,STAT,TOM1,TYRO3,Ubiquitin,UQCRQ,Vegf	20	12	[Nervous System Development and Function, Neurological Disease, Tissue Morphology]
